# Supplementary material for: Elucidation of the Relationship between Intrinsic Viscosity and Molecular Weight of Cellulose Dissolved in Tetra-N-Butyl Ammonium Hydroxide/Dimethyl Sulfoxide
Source: MDPI journal article supplement (doi:10.3390/polym11101605), 2019-10-01
Supplement: s1 [file s1]

Supporting Information

# Elucidation of the Relationship between Intrinsic Viscosity and Molecular Weight of Cellulose Dissolved in Tetra-N-Butyl Ammonium Hydroxide/Dimethyl Sulfoxide

Daqin Bu, Xiangzhou Hu, Zhijie Yang, Xue Yang, Wei Wei, Man Jiang\*, Zuowan Zhou, Ahsan Zaman

Key Laboratory of Advanced Technologies of Materials (Ministry of Education), School of Materials Science and Engineering, Southwest Jiaotong University, 610031, Chengdu, P.R. China

\* Correspondence: jiangman1021@swjtu.edu.cn; Tel.: +86-28-87601980

## 1. Viscosity Analysis of the Cellulose in Various Solution

Cellulose rapidly dissolved in the THDS system to form a transparent uniform solution, as per Video S1.

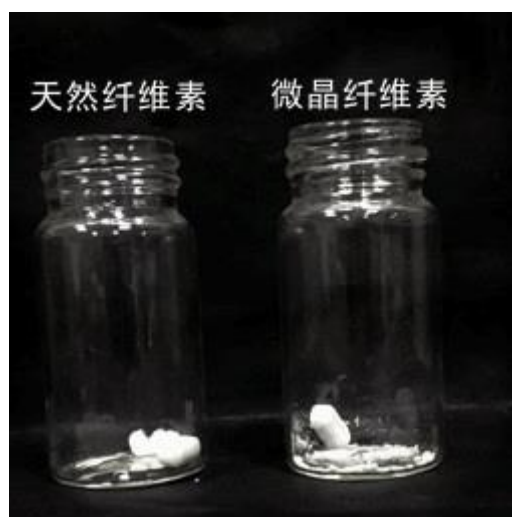

**Video S1.** Rapid dissolution of cellulose.

Pictures of the cellulose/Cuoxam solution, the cellulose/CED solution, and the cellulose/THDS solution are shown in Figure S1. It could be seen that the cellulose/THDS solution was transparent and bright in color, the cellulose/ Cuoxam solution was blue, and the cellulose/CED solution was the darkest in color. The cellulose/THDS solution could be dissolved in just a few minutes, making it easy to prepare and saving time, and the transparent solution was easy to observe.

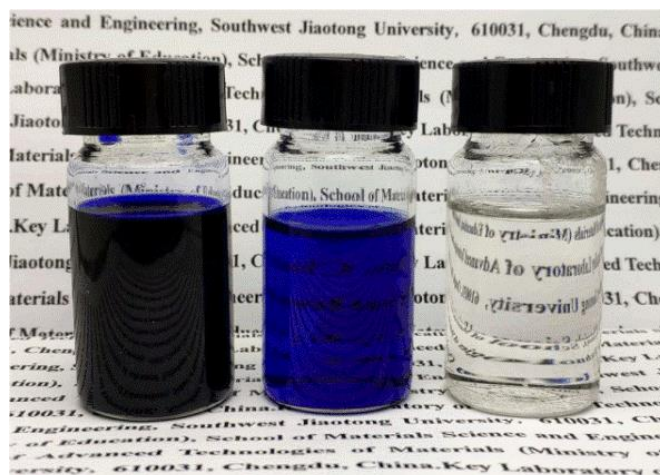

**Figure S1.** Photograph of the cellulose/CED solution (left), cellulose/Cuoxam solution (middle), and the cellulose/THDS solution (right).

## 2. The Elucidation of the Mark–Houwink Equation for the Cellulose/THDS Solution

The value of the parameter  $\alpha$  in the Mark–Houwink equation has been reported.

**Table S1.** Parameters for the Mark–Houwink equation of cellulose dissolved in various solvents.

| Solvent     | Temperature (°C) | K (cm <sup>3</sup> ·g <sup>-1</sup> ) | $\alpha$ | Method for DP Determination | Reference        |
|-------------|------------------|---------------------------------------|----------|-----------------------------|------------------|
| DMAc/LiCl   | 30               | 0.054 <sup>b</sup>                    | 1.19     | Light scattering            | Dupont 2003      |
| BmimAc/DMSO | 25               | 2.5×10 <sup>-4</sup> <sup>a</sup>     | 0.83     | Viscosity method            | Liu et al. 2016  |
| PF/DMSO     | 30               | 3.01 <sup>b</sup>                     | 0.81     | Light scattering            | He and Wang 2000 |
| NaOH/urea   | 25               | 2.45 × 10 <sup>-2</sup> <sup>a</sup>  | 0.815    | Light scattering            | Shi et al. 2018  |
| LiOH        | 25               | 2.78 × 10 <sup>-2</sup> <sup>a</sup>  | 0.79     | Light scattering            | Cai et al. 2006  |
| Cuoxam      | 25               | 0.8 <sup>b</sup>                      | 0.81     | Light scattering            | He and Wang 2000 |
| CED         | 25               | 17.0 <sup>b</sup>                     | 0.80     | Osmotic Pressure            | Liu 1985         |
| Cadoxen     | 25               | 1.8 <sup>b</sup>                      | 0.77     | Light scattering            | He and Wang 2000 |
| NH3/NH4SCN  | 25               | 0.862 <sup>b</sup>                    | 0.95     | -                           | Kasaai 2002      |
| THDS        | 25               | 0.24 <sup>b</sup>                     | 1.21     | Viscosity method            | This work        |

$$^a [\eta] = K \times M^\alpha, \quad ^b [\eta] = K \times DP^\alpha.$$

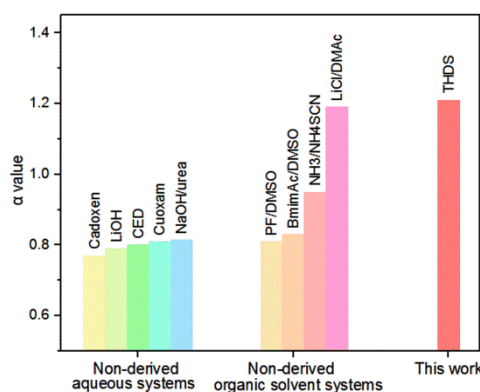

**Figure S2.** Comparison of the  $\alpha$  values in the Mark–Houwink equation of different cellulose solvents.

### 3. FT-IR Characterization of Cellulose Acetate Samples

Fourier-transform infrared (FT-IR) spectra were recorded on a Nicolet 6700 (Thermo Scientific Inc., Waltham, MA, USA) with the KBr-technique, with a spectral resolution of 2 cm<sup>-1</sup> in the range from 4000 to 400 cm<sup>-1</sup> at room temperature. In the sample preparation and measurement process, infrared light was used to bake in order to remove moisture.

The spectra cellulose acetate samples CA1–CA5 (Figure S3) provide a clear evidence of acetylation by showing the presence of some important peaks at 3400 cm<sup>-1</sup> for OH stretching, 1750 cm<sup>-1</sup> for C=O stretching in ester, 1240 cm<sup>-1</sup> for C–O–C stretching, and 1380 cm<sup>-1</sup> for CH<sub>3</sub> bending.

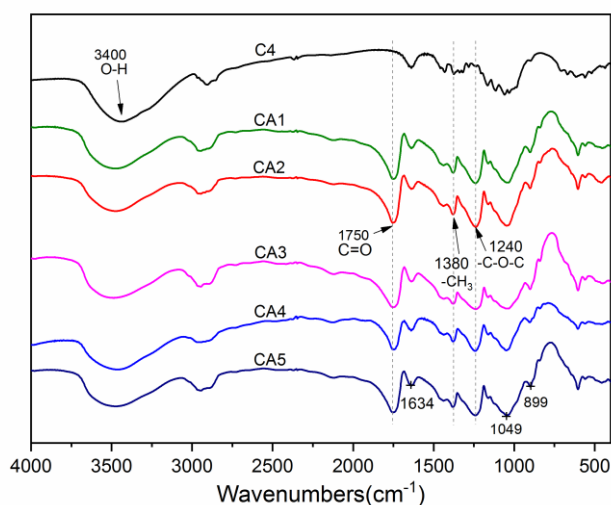

**Figure S3.** FT-IR spectra of samples (cellulose C4 and cellulose acetate samples CA1–CA5).

### 4. <sup>1</sup>H NMR Characterization of Cellulose Acetate Samples

<sup>1</sup>H NMR spectra were recorded in DMSO-d<sub>6</sub> (50 mg/mL) with a Bruker AMX 400 spectrometer running at 400 MHz, at 30 °C, with 16 scans. The DS of acetylated cellulose could be calculated by <sup>1</sup>H NMR spectroscopy according to the following equation:

$$DS = \frac{n_{acetyl} \times I_{acetyl}}{n_{AGU} \times I_{AGU}}, \quad (1)$$

where  $I_{acetyl}$  is the integral of methyl protons of acetyl groups,  $I_{AGU}$  is the integral of all protons of the anhydroglucose unit,  $n_{acetyl}$  is the number of protons in the glucose ring, and  $n_{AGU}$  is the number of methyl proton in acetate groups.

A  $^1\text{H}$ NMR spectrum of cellulose acetate samples is shown in Figure S4. The DS is readily calculated from the ratio of the spectroscopic integral of methyl protons of acetyl groups ( $\delta = 1.7\text{--}2.2$  ppm) and the protons of the anhydroglucose unit ( $\delta = 3.5\text{--}6.0$  ppm).

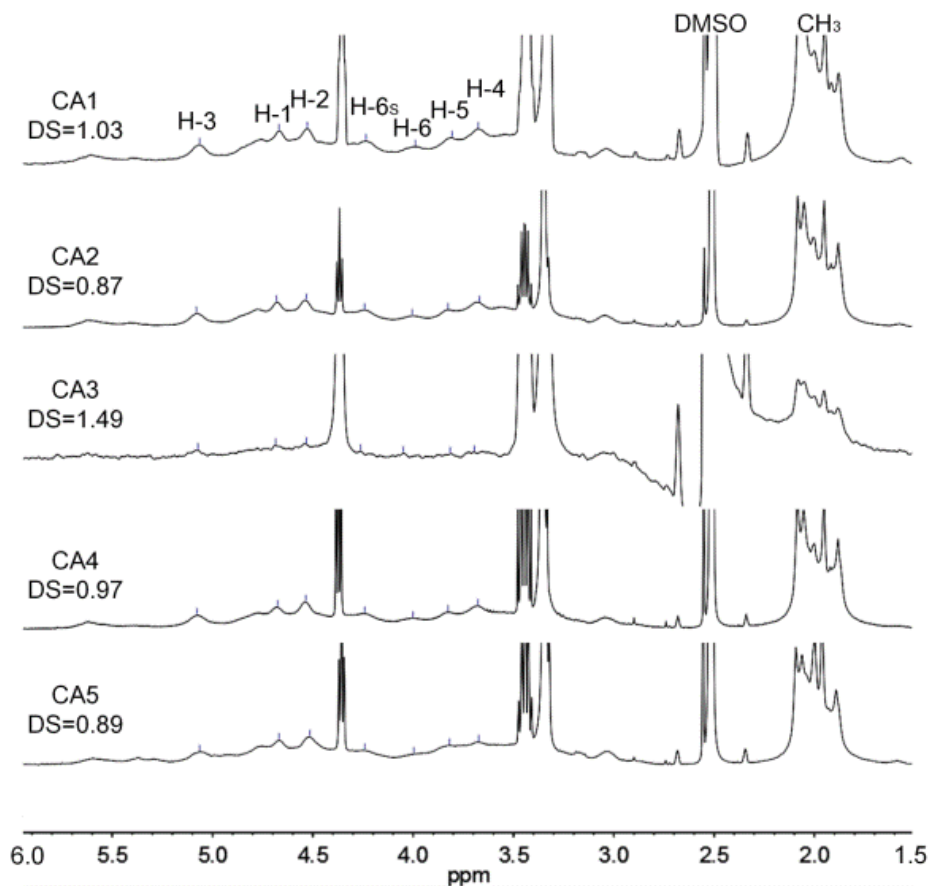

**Figure S4.**  $^1\text{H}$  NMR spectra of cellulose acetate samples CA1–CA5 in  $\text{DMSO-d}_6$  recorded.
